# Supplementary material for: Epitaxially Integrated Hierarchical ZnO/Au/SrTiO3 and ZnO/Ag/Al2O3 Heterostructures: Three-Dimensional Plasmo-Photonic Nanoarchitecturing
Source: MDPI journal article supplement (doi:10.3390/nano11123262), 2021-11-30
Supplement: s1 [file s1]

# Epitaxially Integrated Hierarchical ZnO/Au/SrTiO<sub>3</sub> and ZnO/Ag/Al<sub>2</sub>O<sub>3</sub> Heterostructures: Three-Dimensional Plasmo-Photonic Nanoarchitecturing

Youngdong Yoo <sup>1,\*</sup>, Minjung Kim <sup>2</sup> and Bongsoo Kim <sup>2,\*</sup>

<sup>1</sup> Department of Chemistry, Ajou University, Suwon 16499, Korea

<sup>2</sup> Department of Chemistry, KAIST, Daejeon 34141, Korea;  
mjmj0123@kaist.ac.kr

\* Correspondence: yyoo@ajou.ac.kr (Y.Y.); bongsoo@kaist.ac.kr (B.K.)

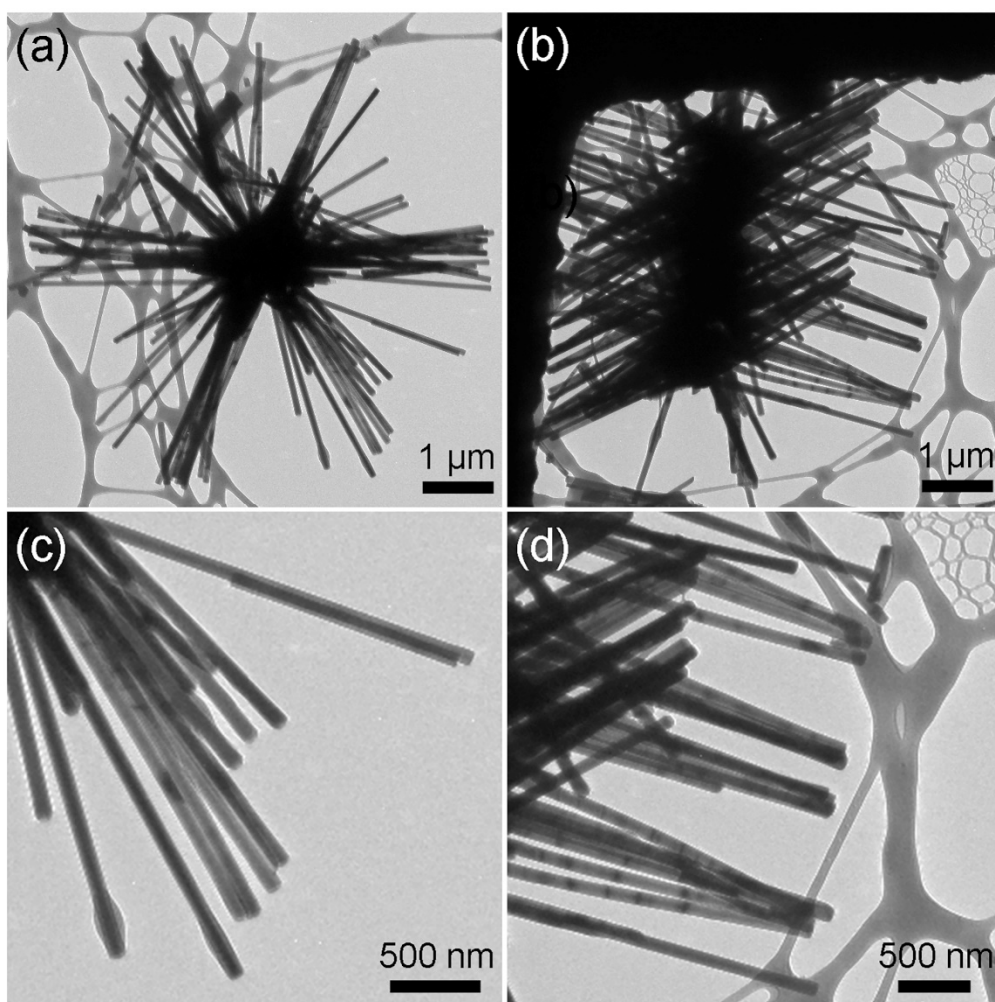

**Figure S1.** TEM images of 3D hierarchical Au–ZnO nanostructures. (a,b) Low-magnification TEM images of 3D hierarchical Au–ZnO nanostructures. (c,d) High-magnification TEM images of ZnO nanowire branches.

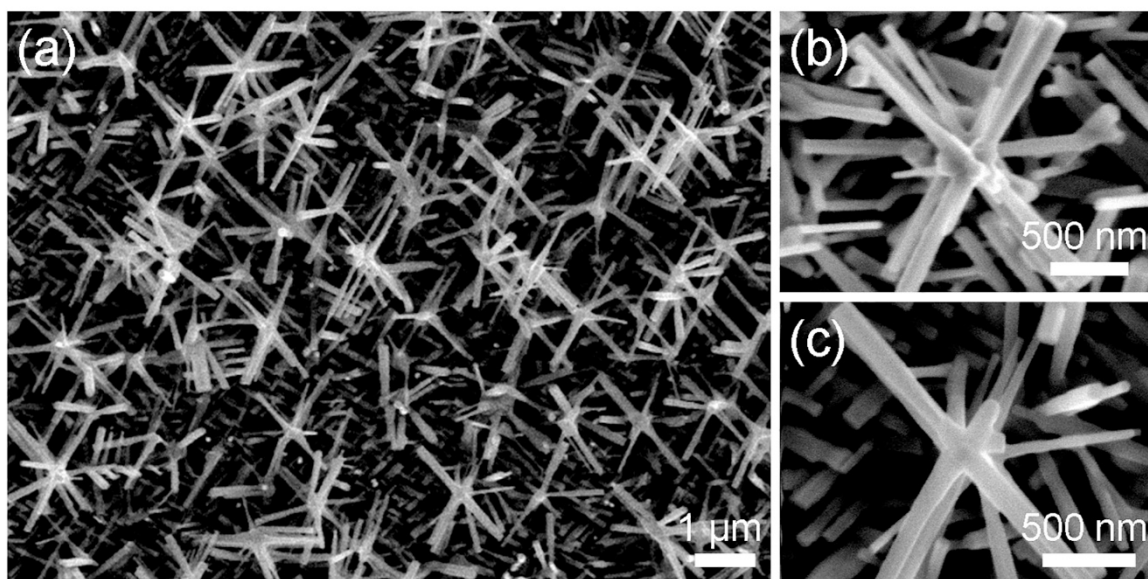

**Figure S2.** SEM images of 3D hierarchical Au-ZnO nanostructures synthesized at a reaction time of 0 min. (a) Low-magnification SEM images of the 3D hierarchical Au-ZnO nanostructures. (b,c) High-magnification SEM images of the 3D hierarchical Au-ZnO nanostructures.

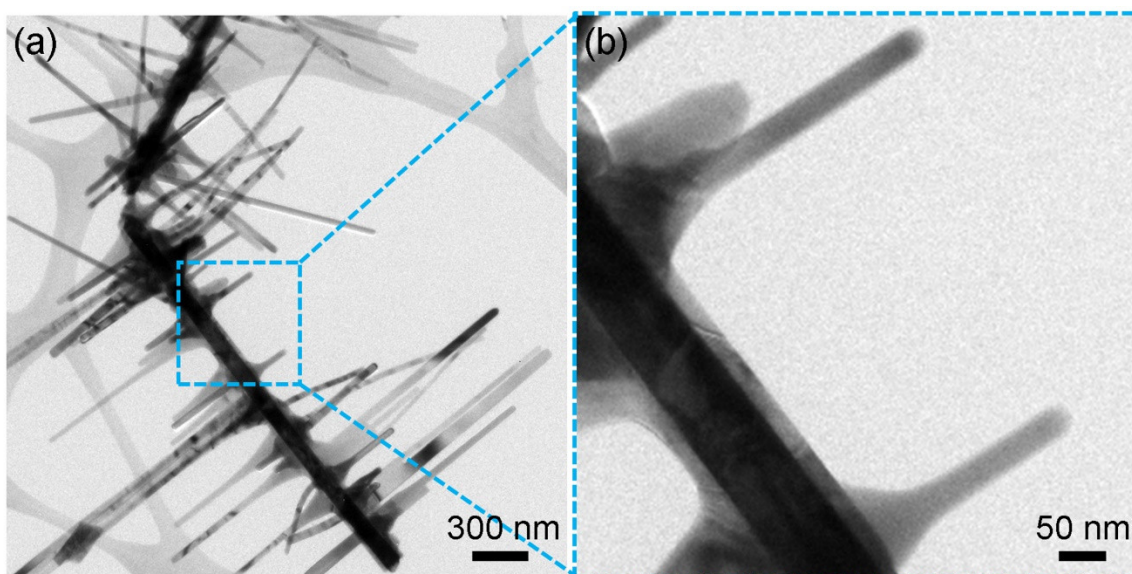

**Figure S3.** TEM images of 3D hierarchical Au-ZnO nanostructures synthesized at a reaction time of 0 min. (a) Low-magnification TEM image of the 3D hierarchical Au-ZnO nanostructures. (b) High-magnification TEM image of the 3D hierarchical Au-ZnO nanostructures.
